# Supplementary material for: Opioid Prescriptions in Chronic Pain Rehabilitation. A Prospective Study on the Prevalence and Association between Individual Patient Characteristics and Opioids
Source: MDPI journal article supplement (doi:10.3390/jcm10102130), 2021-05-14
Supplement: s1 [file s1]

Table S1. Anatomical Therapeutic Chemical (ATC) codes for in- and excluded medications.

| <b>Opioid drugs</b>        | <b>ATC</b>     | <b>Weak or strong<br/>classification</b> |
|----------------------------|----------------|------------------------------------------|
| Included medications       |                |                                          |
| Morphine                   | N02AA01        | Strong                                   |
| Oxycodone                  | N02AA05        | Strong                                   |
| Oxycodone/Naloxone         | N02AA55        | Strong                                   |
| Ketobemidone               | N02AB01        | Strong                                   |
| Fentanyl                   | N02AB03        | Strong                                   |
| Dextrorpropoxyfen          | N02AC04        | Weak                                     |
| Buprenorphine              | N02AE01        | Strong                                   |
| Morphine/antispasmodic     | N02AG01        | Strong                                   |
| Ketobemidone/antispasmodic | N02AG02        | Strong                                   |
| Codeine/paracetamol        | N02AJ06        | Weak                                     |
| Codeine/ibuprofene         | N02AJ08        | Weak                                     |
| Codeine other comb         | N02AJ09        | Weak                                     |
| Tramadol                   | N02AX02        | Weak                                     |
| Tapentadol                 | N02AX06        | Strong                                   |
| Excluded medications       |                |                                          |
| Hydromorphone              | N02AA03        | Strong                                   |
| Dextrorpropoxyfen comb     | N02AC54        | Weak                                     |
| Buprenorphine              | N02BC01        | Strong                                   |
| Methadone                  | N02BC02        | Strong                                   |
| <b>Buprenorphine comb</b>  | <b>N02BC51</b> | <b>Strong</b>                            |
